# Supplementary material for: Association of serum levels of deoxyribose 1-phosphate and S-lactoylglutathione with neoadjuvant chemotherapy sensitivity in patients with gastric cancer: A metabolomics study
Source: PubMed Central journal article supplement — Oncol Lett. 2020 Jan 24;19(3):2231–42. doi: 10.3892/ol.2020.11350 (PMC7039117; doi:10.3892/ol.2020.11350), 2020-01-24
Supplement: Supplementary_Data.pdf [file Supplementary_Data.pdf]

Figure S1. Random images and levels of the four metabolites in the chemo-resistant and chemo-sensitive cases. The blue arrows mark tumor sites. (A-a) Image of chemo-resistant case before chemotherapy. (A-b) Image of chemo-resistant case after chemotherapy. (B-a) Image of chemo-sensitive case before chemotherapy. (B-b) Image of chemo-sensitive case after chemotherapy. (C) Levels of the four metabolites in the chemo-sensitive case and chemo-resistant case. PC, phosphatidylcholine.

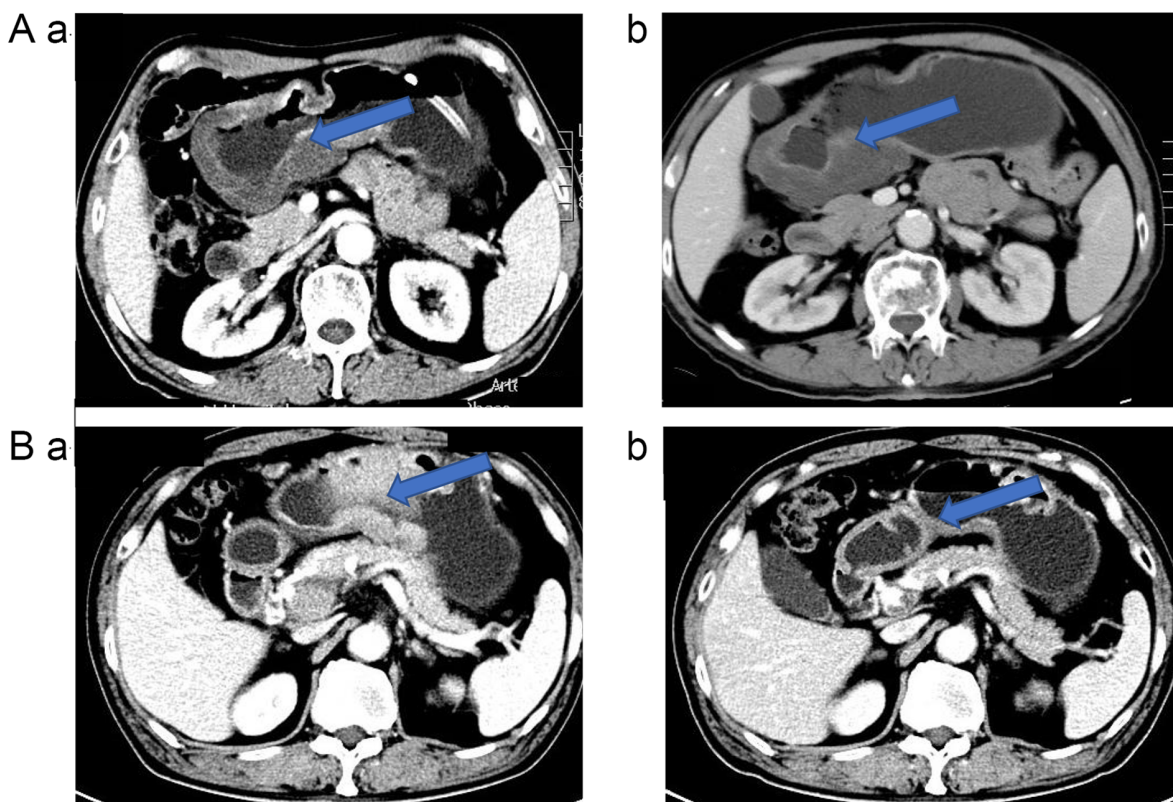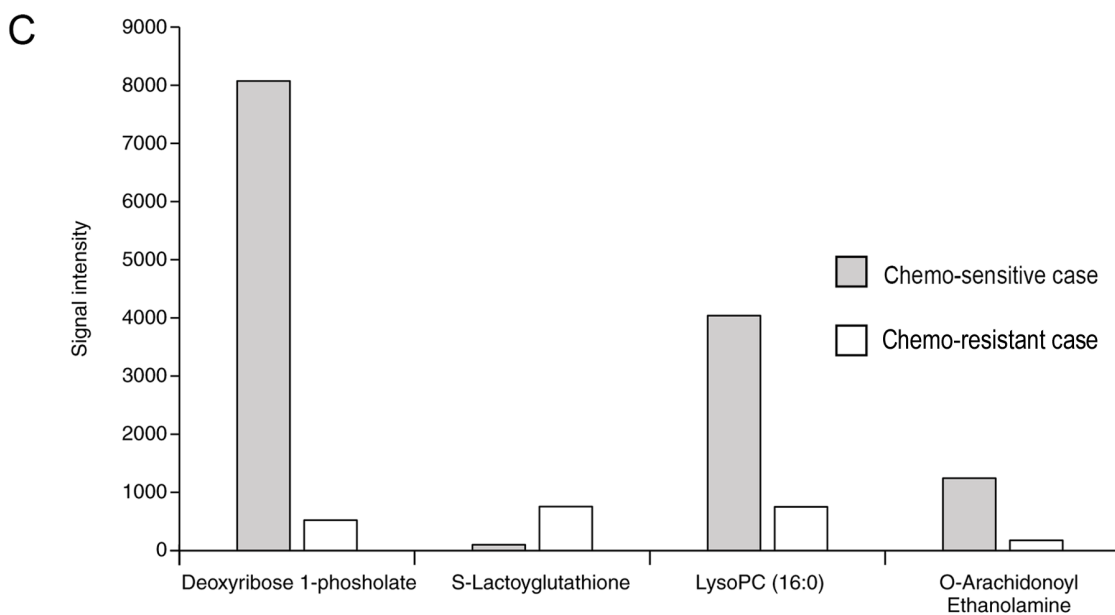

Table SI. Metabolites with significant differences between serum samples from chemo-sensitive and -resistant patients in positive ion mode.

| m/z      | Retention time, min | Signal intensity, mean $\pm$ standard deviation |                          | P-value              |
|----------|---------------------|-------------------------------------------------|--------------------------|----------------------|
|          |                     | Sensitive                                       | Resistant                |                      |
| 99.0452  | 7.3                 | 0.00 $\pm$ 0.00                                 | 22.93 $\pm$ 39.23        | 0.02631 <sup>a</sup> |
| 127.0397 | 7.3                 | 4.90 $\pm$ 13.51                                | 58.21 $\pm$ 95.97        | 0.03586 <sup>a</sup> |
| 183.1013 | 7.28                | 0.00 $\pm$ 0.00                                 | 34.26 $\pm$ 65.82        | 0.04602 <sup>a</sup> |
| 215.0315 | 9.52                | 7598.48 $\pm$ 955.87                            | 2482.61 $\pm$ 811.16     | 0.00141 <sup>b</sup> |
| 228.2321 | 6.91                | 48.81 $\pm$ 15.56                               | 61.92 $\pm$ 19.96        | 0.04984 <sup>a</sup> |
| 230.2479 | 7.35                | 776.44 $\pm$ 133.73                             | 929.68 $\pm$ 113.94      | 0.00187 <sup>b</sup> |
| 235.1685 | 9.55                | 54.04 $\pm$ 37.07                               | 25.46 $\pm$ 38.48        | 0.04402 <sup>a</sup> |
| 243.1211 | 8.59                | 13.67 $\pm$ 31.07                               | 71.87 $\pm$ 108.22       | 0.04802 <sup>a</sup> |
| 255.1225 | 8.88                | 8.64 $\pm$ 24.73                                | 79.61 $\pm$ 128.93       | 0.03898 <sup>a</sup> |
| 256.261  | 7.31                | 59.63 $\pm$ 33.10                               | 80.24 $\pm$ 18.30        | 0.04223 <sup>a</sup> |
| 262.2374 | 5.53                | 117.85 $\pm$ 34.48                              | 161.44 $\pm$ 23.44       | 0.00031 <sup>c</sup> |
| 266.1717 | 6.91                | 7.10 $\pm$ 8.05                                 | 1.81 $\pm$ 4.92          | 0.03681 <sup>a</sup> |
| 273.438  | 7.28                | 480.30 $\pm$ 92.54                              | 564.61 $\pm$ 103.37      | 0.02327 <sup>a</sup> |
| 274.274  | 7.28                | 55738.16 $\pm$ 9069.52                          | 63255.79 $\pm$ 9878.32   | 0.03522 <sup>a</sup> |
| 276.2793 | 7.28                | 1245.56 $\pm$ 226.72                            | 1429.11 $\pm$ 254.23     | 0.04228 <sup>a</sup> |
| 278.2464 | 8.66                | 0.00 $\pm$ 0.00                                 | 33.11 $\pm$ 50.25        | 0.01326 <sup>a</sup> |
| 299.1452 | 6.84                | 1.45 $\pm$ 5.78                                 | 63.60 $\pm$ 121.25       | 0.04948 <sup>a</sup> |
| 299.1833 | 8.61                | 16.19 $\pm$ 37.58                               | 147.43 $\pm$ 251.04      | 0.04758 <sup>a</sup> |
| 300.289  | 8.29                | 170.80 $\pm$ 83.97                              | 317.52 $\pm$ 187.12      | 0.00801 <sup>b</sup> |
| 301.3817 | 8.08                | 199.96 $\pm$ 94.48                              | 263.2 $\pm$ 73.06        | 0.04702 <sup>a</sup> |
| 306.2635 | 5.73                | 41.80 $\pm$ 32.88                               | 93.46 $\pm$ 24.20        | 0.00238 <sup>b</sup> |
| 311.1833 | 8.92                | 7.46 $\pm$ 29.85                                | 168.51 $\pm$ 299.09      | 0.04047 <sup>a</sup> |
| 315.1778 | 8.69                | 3.12 $\pm$ 12.46                                | 64.05 $\pm$ 117.33       | 0.04772 <sup>a</sup> |
| 328.739  | 7.07                | 4.35 $\pm$ 17.3900                              | 60.84 $\pm$ 105.67       | 0.04353 <sup>a</sup> |
| 337.2829 | 11.25               | 317.19 $\pm$ 208.99                             | 712.77 $\pm$ 687.66      | 0.03612 <sup>a</sup> |
| 344.3503 | 9.62                | 306.32 $\pm$ 150.54                             | 426.84 $\pm$ 147.59      | 0.03229 <sup>a</sup> |
| 345.2252 | 9.23                | 0.00 $\pm$ 0.00                                 | 42.14 $\pm$ 65.86        | 0.01587 <sup>a</sup> |
| 351.1753 | 8.92                | 5.15 $\pm$ 20.62                                | 55.74 $\pm$ 85.63        | 0.02911 <sup>a</sup> |
| 354.2279 | 7.63                | 99.04 $\pm$ 46.10                               | 137.03 $\pm$ 48.50       | 0.03320 <sup>a</sup> |
| 357.2698 | 10.25               | 592.5 $\pm$ 293.41                              | 806.27 $\pm$ 197.34      | 0.02502 <sup>a</sup> |
| 357.2762 | 7.55                | 40.66 $\pm$ 57.17                               | 281.79 $\pm$ 450.34      | 0.04215 <sup>a</sup> |
| 357.3092 | 10.16               | 13.69 $\pm$ 24.44                               | 0.00 $\pm$ 0.00          | 0.03865 <sup>a</sup> |
| 358.3661 | 10.31               | 86465.19 $\pm$ 39985.12                         | 111731.61 $\pm$ 24379.47 | 0.04394 <sup>a</sup> |
| 360.2512 | 11.16               | 0.00 $\pm$ 0.00                                 | 25.83 $\pm$ 43.27        | 0.02353 <sup>a</sup> |
| 360.3712 | 10.36               | 2954.95 $\pm$ 1379.86                           | 3805.46 $\pm$ 831.50     | 0.04838 <sup>a</sup> |
| 371.2024 | 9.76                | 6.38 $\pm$ 23.08                                | 91.93 $\pm$ 135.71       | 0.01893 <sup>a</sup> |
| 376.2425 | 10.49               | 22.17 $\pm$ 41.16                               | 0.00 $\pm$ 0.00          | 0.04610 <sup>a</sup> |
| 380.1122 | 11.3                | 312.26 $\pm$ 148.42                             | 855.95 $\pm$ 103.00      | 0.00616 <sup>b</sup> |
| 382.7683 | 6.6                 | 0.00 $\pm$ 0.00                                 | 24.30 $\pm$ 47.33        | 0.04883 <sup>a</sup> |
| 383.2033 | 9.99                | 48.74 $\pm$ 85.74                               | 376.40 $\pm$ 634.11      | 0.04958 <sup>a</sup> |
| 395.3994 | 9.31                | 290.26 $\pm$ 291.23                             | 622.29 $\pm$ 483.62      | 0.02678 <sup>a</sup> |
| 396.7837 | 7.85                | 3.95 $\pm$ 8.55                                 | 57.64 $\pm$ 99.57        | 0.03997 <sup>a</sup> |
| 397.2824 | 7.89                | 0.00 $\pm$ 0.00                                 | 18.55 $\pm$ 33.91        | 0.03664 <sup>a</sup> |
| 397.3754 | 11.68               | 94.82 $\pm$ 82.96                               | 170.21 $\pm$ 116.48      | 0.04586 <sup>a</sup> |
| 402.3902 | 10.29               | 21683.77 $\pm$ 9549.55                          | 27643.98 $\pm$ 5856.49   | 0.04672 <sup>a</sup> |
| 403.2285 | 10.43               | 20.14 $\pm$ 36.53                               | 0.00 $\pm$ 0.00          | 0.04150 <sup>a</sup> |
| 403.2885 | 7.48                | 2.94 $\pm$ 11.77                                | 40.35 $\pm$ 70.18        | 0.04423 <sup>a</sup> |
| 405.2572 | 11.35               | 38.71 $\pm$ 37.19                               | 14.40 $\pm$ 27.12        | 0.04772 <sup>a</sup> |
| 405.7983 | 7.82                | 0.00 $\pm$ 0.00                                 | 32.58 $\pm$ 60.31        | 0.03889 <sup>a</sup> |
| 410.3143 | 10.92               | 98.70 $\pm$ 154.52                              | 0.00 $\pm$ 0.00          | 0.01958 <sup>a</sup> |
| 412.3027 | 8.21                | 0.00 $\pm$ 0.00                                 | 105.64 $\pm$ 182.42      | 0.02764 <sup>a</sup> |
| 413.7948 | 6.6                 | 2.10 $\pm$ 8.41                                 | 38.15 $\pm$ 69.57        | 0.04858 <sup>a</sup> |
| 414.2964 | 6.84                | 14.44 $\pm$ 33.48                               | 251.30 $\pm$ 446.64      | 0.04293 <sup>a</sup> |
| 418.7969 | 7.74                | 4.87 $\pm$ 13.35                                | 72.19 $\pm$ 129.9        | 0.04812 <sup>a</sup> |
| 425.8038 | 8.13                | 1.40 $\pm$ 5.60                                 | 112.22 $\pm$ 193.05      | 0.02898 <sup>a</sup> |
| 426.3365 | 8.25                | 0.00 $\pm$ 0.00                                 | 231.80 $\pm$ 435.41      | 0.04161 <sup>a</sup> |

Table SI. Continued.

| m/z      | Retention time, min | Signal intensity, mean $\pm$ standard deviation |                       | P-value              |
|----------|---------------------|-------------------------------------------------|-----------------------|----------------------|
|          |                     | Sensitive                                       | Resistant             |                      |
| 427.3102 | 7.77                | 22.33 $\pm$ 48.03                               | 179.53 $\pm$ 293.93   | 0.04345 <sup>a</sup> |
| 431.2915 | 8.29                | 0.00 $\pm$ 0.00                                 | 50.94 $\pm$ 95.32     | 0.04090 <sup>a</sup> |
| 431.3109 | 9.48                | 694.53 $\pm$ 94.61                              | 316.66 $\pm$ 39.18    | 0.00180 <sup>b</sup> |
| 433.2511 | 9.93                | 0.00 $\pm$ 0.00                                 | 34.72 $\pm$ 56.26     | 0.01957 <sup>a</sup> |
| 434.3169 | 8.11                | 10.94 $\pm$ 30.18                               | 187.38 $\pm$ 325      | 0.03884 <sup>a</sup> |
| 434.3327 | 7.87                | 0.00 $\pm$ 0.00                                 | 324.1 $\pm$ 632.86    | 0.04942 <sup>a</sup> |
| 434.8173 | 8.13                | 3.28 $\pm$ 2.28                                 | 75.10 $\pm$ 34.81     | 0.04223 <sup>a</sup> |
| 436.7931 | 8.09                | 0.00 $\pm$ 0.00                                 | 42.49 $\pm$ 74.43     | 0.02973 <sup>a</sup> |
| 438.2935 | 8.95                | 302.03 $\pm$ 142.41                             | 626.39 $\pm$ 520.36   | 0.02295 <sup>a</sup> |
| 440.8087 | 7.74                | 0.00 $\pm$ 0.00                                 | 58.10 $\pm$ 104.17    | 0.03340 <sup>a</sup> |
| 441.325  | 8.58                | 0.00 $\pm$ 0.00                                 | 266.94 $\pm$ 466.56   | 0.02941 <sup>a</sup> |
| 443.2587 | 9.83                | 0.00 $\pm$ 0.00                                 | 79.99 $\pm$ 139.01    | 0.02856 <sup>a</sup> |
| 445.2742 | 9.76                | 47.62 $\pm$ 112.92                              | 348.48 $\pm$ 526.50   | 0.03336 <sup>a</sup> |
| 447.8163 | 8.06                | 10.4 $\pm$ 18.63                                | 107.8 $\pm$ 182.79    | 0.04249 <sup>a</sup> |
| 448.3163 | 8.03                | 0.00 $\pm$ 0.00                                 | 40.57 $\pm$ 75.69     | 0.04032 <sup>a</sup> |
| 450.3167 | 6.88                | 48.58 $\pm$ 65.4                                | 485.30 $\pm$ 795.4    | 0.03665 <sup>a</sup> |
| 451.7993 | 7.67                | 0.00 $\pm$ 0.00                                 | 27.59 $\pm$ 49.65     | 0.03401 <sup>a</sup> |
| 454.2874 | 8.6                 | 2729.15 $\pm$ 1072.99                           | 3837.61 $\pm$ 1680.84 | 0.03567 <sup>a</sup> |
| 454.8237 | 8.38                | 0.00 $\pm$ 0.00                                 | 128.57 $\pm$ 224.07   | 0.02898 <sup>a</sup> |
| 456.3284 | 8.06                | 26.24 $\pm$ 50.51                               | 368.29 $\pm$ 637.39   | 0.04074 <sup>a</sup> |
| 456.3454 | 7.56                | 0.00 $\pm$ 0.00                                 | 500.79 $\pm$ 979.46   | 0.04976 <sup>a</sup> |
| 457.2732 | 10.01               | 141.81 $\pm$ 294.42                             | 1471.25 $\pm$ 2454.12 | 0.03978 <sup>a</sup> |
| 458.8065 | 8.08                | 1.74 $\pm$ 6.96                                 | 58.11 $\pm$ 96.72     | 0.02714 <sup>a</sup> |
| 462.2986 | 9.76                | 42.25 $\pm$ 99.4                                | 299.41 $\pm$ 446.00   | 0.03221 <sup>a</sup> |
| 463.3352 | 8.41                | 14.17 $\pm$ 33.12                               | 393.76 $\pm$ 675.68   | 0.03243 <sup>a</sup> |
| 464.3084 | 9.23                | 127.33 $\pm$ 120.8                              | 375.71 $\pm$ 358.31   | 0.01382 <sup>a</sup> |
| 464.3243 | 7.34                | 0.00 $\pm$ 0.00                                 | 63.60 $\pm$ 124.31    | 0.04962 <sup>a</sup> |
| 465.2401 | 9.8                 | 21.78 $\pm$ 87.11                               | 171.67 $\pm$ 267.39   | 0.04204 <sup>a</sup> |
| 469.8284 | 7.96                | 9.43 $\pm$ 20.4                                 | 97.68 $\pm$ 158.19    | 0.03483 <sup>a</sup> |
| 470.3607 | 8.13                | 0.00 $\pm$ 0.00                                 | 472.32 $\pm$ 888.17   | 0.04182 <sup>a</sup> |
| 471.1001 | 11.82               | 882.39 $\pm$ 1562.64                            | 31.68 $\pm$ 80.06     | 0.04420 <sup>a</sup> |
| 473.0967 | 11.84               | 538.67 $\pm$ 978.53                             | 12.01 $\pm$ 46.53     | 0.04647 <sup>a</sup> |
| 474.3009 | 9.99                | 123.08 $\pm$ 247.55                             | 1154.77 $\pm$ 1909.71 | 0.04053 <sup>a</sup> |
| 476.8342 | 8.31                | 6.64 $\pm$ 14.72                                | 142.14 $\pm$ 238.13   | 0.03054 <sup>a</sup> |
| 477.3361 | 8.27                | 0.00 $\pm$ 0.00                                 | 55.45 $\pm$ 98.33     | 0.03162 <sup>a</sup> |
| 478.3238 | 8.76                | 752.77 $\pm$ 201.33                             | 1019.17 $\pm$ 306.70  | 0.00745 <sup>b</sup> |
| 478.3414 | 7.96                | 56.48 $\pm$ 101.34                              | 413.76 $\pm$ 677.12   | 0.04568 <sup>a</sup> |
| 480.8198 | 7.98                | 0.00 $\pm$ 0.00                                 | 57.10 $\pm$ 99.01     | 0.02824 <sup>a</sup> |
| 481.0033 | 7.9                 | 6.05 $\pm$ 16.91                                | 34.90 $\pm$ 52.17     | 0.04460 <sup>a</sup> |
| 482.3187 | 9.73                | 2399.39 $\pm$ 1107.66                           | 3422.60 $\pm$ 1013.56 | 0.01208 <sup>a</sup> |
| 484.3243 | 9.71                | 0.00 $\pm$ 0.00                                 | 53.58 $\pm$ 79.83     | 0.01178 <sup>a</sup> |
| 484.3756 | 8.72                | 0.00 $\pm$ 0.00                                 | 240.19 $\pm$ 447.95   | 0.04026 <sup>a</sup> |
| 485.3472 | 8.31                | 38.71 $\pm$ 69.54                               | 515.41 $\pm$ 869.90   | 0.03695 <sup>a</sup> |
| 487.827  | 8.35                | 0.00 $\pm$ 0.00                                 | 75.26 $\pm$ 126.04    | 0.02350 <sup>a</sup> |
| 490.3306 | 10.32               | 0.00 $\pm$ 0.00                                 | 66.33 $\pm$ 104.42    | 0.01656 <sup>a</sup> |
| 491.0031 | 7.14                | 0.00 $\pm$ 0.00                                 | 26.43 $\pm$ 47.04     | 0.03221 <sup>a</sup> |
| 491.3094 | 7.09                | 0.00 $\pm$ 0.00                                 | 39.22 $\pm$ 76.31     | 0.04865 <sup>a</sup> |
| 491.8424 | 7.91                | 9.89 $\pm$ 21.40                                | 88.18 $\pm$ 143.82    | 0.03964 <sup>a</sup> |
| 492.3395 | 7.87                | 0.00 $\pm$ 0.00                                 | 46.62 $\pm$ 80.37     | 0.02742 <sup>a</sup> |
| 492.3555 | 8.72                | 7.46 $\pm$ 20.41                                | 334.45 $\pm$ 627.44   | 0.04590 <sup>a</sup> |
| 494.8101 | 8.68                | 1624.18 $\pm$ 458.68                            | 2231.47 $\pm$ 774.97  | 0.01213 <sup>a</sup> |
| 496.3331 | 8.78                | 6637.71 $\pm$ 2345.54                           | 1033.40 $\pm$ 342.01  | 0.02887 <sup>a</sup> |
| 498.8489 | 8.26                | 10.50 $\pm$ 22.64                               | 146.97 $\pm$ 245.69   | 0.03482 <sup>a</sup> |
| 499.3416 | 8.78                | 1611.18 $\pm$ 465.13                            | 2175.7 $\pm$ 683.84   | 0.01136 <sup>a</sup> |
| 499.349  | 8.21                | 0.00 $\pm$ 0.00                                 | 69.19 $\pm$ 116.78    | 0.02451 <sup>a</sup> |
| 502.8316 | 7.87                | 7.81 $\pm$ 16.89                                | 51.14 $\pm$ 82.00     | 0.04752 <sup>a</sup> |
| 503.3324 | 7.87                | 0.00 $\pm$ 0.00                                 | 25.60 $\pm$ 42.28     | 0.02178 <sup>a</sup> |

Table SI. Continued.

| m/z      | Retention time, min | Signal intensity, mean $\pm$ standard deviation |                          | P-value              |
|----------|---------------------|-------------------------------------------------|--------------------------|----------------------|
|          |                     | Sensitive                                       | Resistant                |                      |
| 505.8571 | 8.58                | 0.00 $\pm$ 0.00                                 | 164.35 $\pm$ 283.57      | 0.02752 <sup>a</sup> |
| 506.3582 | 8.62                | 0.00 $\pm$ 0.00                                 | 68.11 $\pm$ 125.93       | 0.03867 <sup>a</sup> |
| 507.36   | 8.2                 | 64.44 $\pm$ 116.29                              | 607.95 $\pm$ 1009.81     | 0.04088 <sup>a</sup> |
| 509.8387 | 8.21                | 8.32 $\pm$ 18.16                                | 87.23 $\pm$ 144.62       | 0.03859 <sup>a</sup> |
| 514.3668 | 8.62                | 0.00 $\pm$ 0.00                                 | 639.70 $\pm$ 1073.96     | 0.02382 <sup>a</sup> |
| 514.3853 | 7.96                | 6.32 $\pm$ 25.29                                | 629.41 $\pm$ 1170.62     | 0.04169 <sup>a</sup> |
| 515.8611 | 7.53                | 3.98 $\pm$ 15.91                                | 71.01 $\pm$ 129.27       | 0.04849 <sup>a</sup> |
| 518.737  | 8.41                | 543.45 $\pm$ 323.18                             | 864.39 $\pm$ 332.16      | 0.01075 <sup>a</sup> |
| 520.3325 | 8.37                | 94077.98 $\pm$ 37345.01                         | 136482.56 $\pm$ 54014.90 | 0.01607 <sup>a</sup> |
| 520.8599 | 8.16                | 15.01 $\pm$ 27.14                               | 138.42 $\pm$ 227.67      | 0.03965 <sup>a</sup> |
| 521.3777 | 9.1                 | 0.00 $\pm$ 0.00                                 | 446.56 $\pm$ 774.48      | 0.02826 <sup>a</sup> |
| 522.426  | 8.09                | 0.00 $\pm$ 0.00                                 | 23.20 $\pm$ 41.58        | 0.03335 <sup>a</sup> |
| 523.3396 | 8.37                | 666.57 $\pm$ 299.46                             | 940.63 $\pm$ 338.46      | 0.02350 <sup>a</sup> |
| 524.8432 | 7.8                 | 5.07 $\pm$ 14.38                                | 51.28 $\pm$ 82.40        | 0.03512 <sup>a</sup> |
| 525.0271 | 7.74                | 6.65 $\pm$ 18.32                                | 50.50 $\pm$ 80.22        | 0.04176 <sup>a</sup> |
| 527.8695 | 8.53                | 3.51 $\pm$ 14.03                                | 174.76 $\pm$ 303.41      | 0.03166 <sup>a</sup> |
| 528.3993 | 8.49                | 0.00 $\pm$ 0.00                                 | 589.86 $\pm$ 1073.13     | 0.03583 <sup>a</sup> |
| 529.3719 | 8.15                | 80.04 $\pm$ 143.36                              | 637.20 $\pm$ 1053.33     | 0.04478 <sup>a</sup> |
| 531.8504 | 8.16                | 5.45 $\pm$ 14.93                                | 82.18 $\pm$ 135.51       | 0.03199 <sup>a</sup> |
| 535.8657 | 7.75                | 0.00 $\pm$ 0.00                                 | 62.05 $\pm$ 98.01        | 0.01688 <sup>a</sup> |
| 536.3793 | 8.48                | 59.21 $\pm$ 109.91                              | 733.22 $\pm$ 1224.57     | 0.03634 <sup>a</sup> |
| 537.3721 | 7.51                | 6.69 $\pm$ 26.77                                | 95.01 $\pm$ 169.34       | 0.04836 <sup>a</sup> |
| 539.7014 | 7.22                | 0.00 $\pm$ 0.00                                 | 36.74 $\pm$ 66.96        | 0.03615 <sup>a</sup> |
| 539.8487 | 6.94                | 0.00 $\pm$ 0.00                                 | 24.76 $\pm$ 48.29        | 0.04916 <sup>a</sup> |
| 542.6585 | 8.44                | 9.55 $\pm$ 26.28                                | 77.23 $\pm$ 126.29       | 0.04473 <sup>a</sup> |
| 542.8749 | 8.09                | 16.37 $\pm$ 29.55                               | 118.02 $\pm$ 194.43      | 0.04765 <sup>a</sup> |
| 543.3715 | 8.05                | 3.85 $\pm$ 15.39                                | 55.64 $\pm$ 96.31        | 0.04227 <sup>a</sup> |
| 543.3904 | 8.97                | 24.1 $\pm$ 45.24                                | 508.90 $\pm$ 856.04      | 0.03119 <sup>a</sup> |
| 544.881  | 7.75                | 8.60 $\pm$ 34.40                                | 162.99 $\pm$ 281.37      | 0.03752 <sup>a</sup> |
| 548.2656 | 8.23                | 188.65 $\pm$ 90.9                               | 121.67 $\pm$ 84.34       | 0.04242 <sup>a</sup> |
| 548.3629 | 9.44                | 1094.15 $\pm$ 842.46                            | 2001.38 $\pm$ 1467.84    | 0.04197 <sup>a</sup> |
| 548.3858 | 9.07                | 43.99 $\pm$ 81.62                               | 0.00 $\pm$ 0.00          | 0.04595 <sup>a</sup> |
| 549.8819 | 8.4                 | 0.00 $\pm$ 0.00                                 | 167.16 $\pm$ 273.40      | 0.02063 <sup>a</sup> |
| 550.4376 | 10.24               | 1772.24 $\pm$ 706.03                            | 2431.53 $\pm$ 879.76     | 0.02830 <sup>a</sup> |
| 551.3859 | 8.08                | 87.57 $\pm$ 157.31                              | 597.72 $\pm$ 979.80      | 0.04879 <sup>a</sup> |
| 553.8644 | 8.09                | 9.57 $\pm$ 20.99                                | 72.12 $\pm$ 114.62       | 0.04027 <sup>a</sup> |
| 556.8864 | 8.82                | 0.00 $\pm$ 0.00                                 | 130.35 $\pm$ 227.50      | 0.02919 <sup>a</sup> |
| 558.4112 | 7.88                | 15.63 $\pm$ 38.04                               | 720.43 $\pm$ 1360.53     | 0.04710 <sup>a</sup> |
| 560.8712 | 8.38                | 0.00 $\pm$ 0.00                                 | 81.84 $\pm$ 141.93       | 0.02827 <sup>a</sup> |
| 565.3886 | 8                   | 1.94 $\pm$ 7.74                                 | 61.72 $\pm$ 101.59       | 0.02583 <sup>a</sup> |
| 569.383  | 7.2                 | 0.00 $\pm$ 0.00                                 | 66.78 $\pm$ 118.38       | 0.03157 <sup>a</sup> |
| 571.8926 | 8.37                | 12.22 $\pm$ 26.41                               | 143.95 $\pm$ 231.55      | 0.03133 <sup>a</sup> |
| 572.4091 | 9.31                | 0.00 $\pm$ 0.00                                 | 474.84 $\pm$ 818.18      | 0.02733 <sup>a</sup> |
| 572.4273 | 8.37                | 0.00 $\pm$ 0.00                                 | 813.81 $\pm$ 1486.27     | 0.03650 <sup>a</sup> |
| 578.9014 | 8.7                 | 0.00 $\pm$ 0.00                                 | 148.41 $\pm$ 259.28      | 0.02934 <sup>a</sup> |
| 582.884  | 8.31                | 5.39 $\pm$ 15.39                                | 87.68 $\pm$ 142.74       | 0.02919 <sup>a</sup> |
| 585.2595 | 8.58                | 1269.05 $\pm$ 813.73                            | 661.47 $\pm$ 744.06      | 0.03876 <sup>a</sup> |
| 586.898  | 7.92                | 3.67 $\pm$ 14.68                                | 78.43 $\pm$ 135.64       | 0.03645 <sup>a</sup> |
| 587.4148 | 8.69                | 76.82 $\pm$ 140.35                              | 625.32 $\pm$ 1053.08     | 0.04784 <sup>a</sup> |
| 587.9167 | 8.72                | 42.39 $\pm$ 95.91                               | 393.76 $\pm$ 679.34      | 0.04955 <sup>a</sup> |
| 593.9052 | 8.26                | 17.7 $\pm$ 38.63                                | 128.31 $\pm$ 206.42      | 0.04390 <sup>a</sup> |
| 594.4078 | 8.24                | 0.00 $\pm$ 0.00                                 | 73.28 $\pm$ 121.58       | 0.02233 <sup>a</sup> |
| 594.4219 | 9.15                | 34.59 $\pm$ 64.94                               | 563.23 $\pm$ 949.99      | 0.03418 <sup>a</sup> |
| 595.4113 | 7.93                | 19.78 $\pm$ 79.14                               | 374.47 $\pm$ 645.68      | 0.03733 <sup>a</sup> |
| 600.4562 | 9.62                | 7.91 $\pm$ 31.65                                | 167.62 $\pm$ 302.16      | 0.04413 <sup>a</sup> |
| 600.911  | 8.57                | 0.00 $\pm$ 0.00                                 | 139.52 $\pm$ 241.95      | 0.02825 <sup>a</sup> |
| 601.4299 | 9.6                 | 8.84 $\pm$ 35.37                                | 353.71 $\pm$ 585.78      | 0.02562 <sup>a</sup> |

Table SI. Continued.

| m/z      | Retention time, min | Signal intensity, mean $\pm$ standard deviation |                       | P-value              |
|----------|---------------------|-------------------------------------------------|-----------------------|----------------------|
|          |                     | Sensitive                                       | Resistant             |                      |
| 602.4159 | 8.2                 | 42.40 $\pm$ 124.03                              | 527.58 $\pm$ 915.89   | 0.04446 <sup>a</sup> |
| 602.4365 | 7.78                | 39.87 $\pm$ 71.4                                | 773.13 $\pm$ 1430.61  | 0.04952 <sup>a</sup> |
| 604.8958 | 8.29                | 10.99 $\pm$ 30.29                               | 87.48 $\pm$ 138.78    | 0.03978 <sup>a</sup> |
| 605.3994 | 8.26                | 0.00 $\pm$ 0.00                                 | 43.70 $\pm$ 76.12     | 0.02889 <sup>a</sup> |
| 607.3328 | 10.9                | 269.51 $\pm$ 356.60                             | 725.91 $\pm$ 569.03   | 0.01160 <sup>a</sup> |
| 607.9218 | 9                   | 0.00 $\pm$ 0.00                                 | 132.28 $\pm$ 227.74   | 0.02721 <sup>a</sup> |
| 608.9102 | 7.91                | 0.00 $\pm$ 0.00                                 | 61.64 $\pm$ 96.06     | 0.01558 <sup>a</sup> |
| 609.4267 | 8.63                | 102.25 $\pm$ 185.89                             | 752.20 $\pm$ 1227.12  | 0.04497 <sup>a</sup> |
| 610.9192 | 7.59                | 0.00 $\pm$ 0.00                                 | 147.17 $\pm$ 268.75   | 0.03647 <sup>a</sup> |
| 611.9058 | 8.63                | 0.00 $\pm$ 0.00                                 | 86.48 $\pm$ 149.98    | 0.02826 <sup>a</sup> |
| 612.8934 | 7.09                | 0.00 $\pm$ 0.00                                 | 21.59 $\pm$ 41.59     | 0.04659 <sup>a</sup> |
| 616.4495 | 8.2                 | 5.07 $\pm$ 20.28                                | 1016.94 $\pm$ 1830.76 | 0.03491 <sup>a</sup> |
| 619.9034 | 7.9                 | 0.00 $\pm$ 0.00                                 | 31.54 $\pm$ 54.68     | 0.02823 <sup>a</sup> |
| 622.924  | 8.52                | 0.00 $\pm$ 0.00                                 | 130.81 $\pm$ 207.05   | 0.01709 <sup>a</sup> |
| 623.443  | 9.44                | 29.67 $\pm$ 66.78                               | 409.61 $\pm$ 671.81   | 0.03200 <sup>a</sup> |
| 629.9303 | 8.88                | 3.86 $\pm$ 15.44                                | 119.59 $\pm$ 194.45   | 0.02436 <sup>a</sup> |
| 630.4099 | 10.87               | 12.57 $\pm$ 34.72                               | 131.07 $\pm$ 220.78   | 0.04255 <sup>a</sup> |
| 630.4632 | 8.75                | 0.00 $\pm$ 0.00                                 | 564.79 $\pm$ 1032.32  | 0.03664 <sup>a</sup> |
| 630.9242 | 7.85                | 3.04 $\pm$ 12.15                                | 39.68 $\pm$ 69.09     | 0.04555 <sup>a</sup> |
| 633.9163 | 8.52                | 0.00 $\pm$ 0.00                                 | 88.85 $\pm$ 135.88    | 0.01389 <sup>a</sup> |
| 634.4174 | 8.52                | 0.00 $\pm$ 0.00                                 | 38.02 $\pm$ 73.53     | 0.04739 <sup>a</sup> |
| 637.4332 | 7.59                | 25.52 $\pm$ 47.36                               | 0.00 $\pm$ 0.00       | 0.04600 <sup>a</sup> |
| 637.9288 | 8.08                | 12.67 $\pm$ 27.28                               | 89.46 $\pm$ 143.27    | 0.04398 <sup>a</sup> |
| 638.4322 | 8.11                | 2.41 $\pm$ 9.63                                 | 52.81 $\pm$ 92.78     | 0.03892 <sup>a</sup> |
| 644.4827 | 9.39                | 0.00 $\pm$ 0.00                                 | 409.51 $\pm$ 728.18   | 0.03206 <sup>a</sup> |
| 644.9385 | 8.4                 | 0.00 $\pm$ 0.00                                 | 111.18 $\pm$ 172.72   | 0.01529 <sup>a</sup> |
| 645.4513 | 9.29                | 33.28 $\pm$ 94.08                               | 633.45 $\pm$ 1050.77  | 0.03031 <sup>a</sup> |
| 646.4056 | 6.49                | 60.47 $\pm$ 73.15                               | 4.45 $\pm$ 11.82      | 0.00659 <sup>b</sup> |
| 651.3986 | 11.23               | 6.15 $\pm$ 24.61                                | 42.34 $\pm$ 66.04     | 0.04977 <sup>a</sup> |
| 651.9441 | 8.75                | 0.00 $\pm$ 0.00                                 | 99.39 $\pm$ 155.89    | 0.01620 <sup>a</sup> |
| 652.4622 | 9.86                | 0.00 $\pm$ 0.00                                 | 222.03 $\pm$ 386.99   | 0.02899 <sup>a</sup> |
| 654.4363 | 7.05                | 427.61 $\pm$ 115.87                             | 49.90 $\pm$ 20.11     | 0.00475 <sup>b</sup> |
| 659.9398 | 8.01                | 7.44 $\pm$ 20.39                                | 61.43 $\pm$ 96.19     | 0.03627 <sup>a</sup> |
| 659.9726 | 10.38               | 0.00 $\pm$ 0.00                                 | 47.54 $\pm$ 85.01     | 0.03294 <sup>a</sup> |
| 660.4729 | 8.11                | 20.70 $\pm$ 44.66                               | 1004.16 $\pm$ 1803.81 | 0.03730 <sup>a</sup> |
| 661.9507 | 7.74                | 17.33 $\pm$ 44.84                               | 192.64 $\pm$ 311.17   | 0.03355 <sup>a</sup> |
| 667.4519 | 8.35                | 0.00 $\pm$ 0.00                                 | 52.14 $\pm$ 79.55     | 0.01369 <sup>a</sup> |
| 674.4717 | 9.57                | 0.00 $\pm$ 0.00                                 | 265.41 $\pm$ 428.37   | 0.01914 <sup>a</sup> |
| 674.4912 | 8.6                 | 0.00 $\pm$ 0.00                                 | 1053.69 $\pm$ 1862.41 | 0.03111 <sup>a</sup> |
| 674.974  | 9.67                | 6.40 $\pm$ 25.60                                | 158.91 $\pm$ 275.16   | 0.03520 <sup>a</sup> |
| 680.9665 | 9.03                | 5.09 $\pm$ 20.38                                | 69.31 $\pm$ 121.53    | 0.04599 <sup>a</sup> |
| 681.4815 | 10.17               | 0.00 $\pm$ 0.00                                 | 95.01 $\pm$ 164.66    | 0.02816 <sup>a</sup> |
| 681.9533 | 7.95                | 2.87 $\pm$ 11.48                                | 40.26 $\pm$ 69.95     | 0.04358 <sup>a</sup> |
| 683.4617 | 7.71                | 6.35 $\pm$ 25.41                                | 92.93 $\pm$ 165.56    | 0.04764 <sup>a</sup> |
| 683.9625 | 7.69                | 6.71 $\pm$ 14.63                                | 131.34 $\pm$ 227.04   | 0.03644 <sup>a</sup> |
| 688.5071 | 9.15                | 0.00 $\pm$ 0.00                                 | 639.01 $\pm$ 1119.63  | 0.02978 <sup>a</sup> |
| 695.9702 | 8.58                | 6.30 $\pm$ 25.22                                | 76.82 $\pm$ 120.06    | 0.02894 <sup>a</sup> |
| 701.52   | 7.09                | 0.00 $\pm$ 0.00                                 | 32.64 $\pm$ 62.93     | 0.04679 <sup>a</sup> |
| 701.5476 | 8.89                | 16.98 $\pm$ 67.91                               | 170.2 $\pm$ 264.19    | 0.03260 <sup>a</sup> |
| 703.4867 | 10.41               | 0.00 $\pm$ 0.00                                 | 94.03 $\pm$ 146.9     | 0.01582 <sup>a</sup> |
| 703.9956 | 9.98                | 5.89 $\pm$ 23.57                                | 85.80 $\pm$ 152.46    | 0.04723 <sup>a</sup> |
| 704.4994 | 8.03                | 43.92 $\pm$ 78.70                               | 966.77 $\pm$ 1719.31  | 0.04028 <sup>a</sup> |
| 718.5128 | 8.46                | 419.98 $\pm$ 152.03                             | 817.05 $\pm$ 101.27   | 0.04175 <sup>a</sup> |
| 732.5286 | 8.96                | 0.00 $\pm$ 0.00                                 | 759.57 $\pm$ 1328.89  | 0.02955 <sup>a</sup> |
| 734.998  | 7.87                | 3.58 $\pm$ 14.31                                | 77.28 $\pm$ 139.06    | 0.04357 <sup>a</sup> |
| 746.5434 | 9.52                | 0.00 $\pm$ 0.00                                 | 456.01 $\pm$ 801.59   | 0.03027 <sup>a</sup> |
| 748.5258 | 7.91                | 63.82 $\pm$ 115.05                              | 782.80 $\pm$ 1372.77  | 0.04554 <sup>a</sup> |

Table SI. Continued.

| m/z      | Retention time, min | Signal intensity, mean $\pm$ standard deviation |                           | P-value              |
|----------|---------------------|-------------------------------------------------|---------------------------|----------------------|
|          |                     | Sensitive                                       | Resistant                 |                      |
| 756.5079 | 7.8                 | 0.00 $\pm$ 0.00                                 | 84.99 $\pm$ 138.68        | 0.02035 <sup>a</sup> |
| 762.5351 | 8.33                | 32.75 $\pm$ 59.38                               | 1028.43 $\pm$ 1786.84     | 0.03364 <sup>a</sup> |
| 765.9736 | 8.93                | 182.70 $\pm$ 117.91                             | 99.65 $\pm$ 92.87         | 0.03845 <sup>a</sup> |
| 776.5512 | 8.8                 | 0.00 $\pm$ 0.00                                 | 664.59 $\pm$ 1170.24      | 0.03053 <sup>a</sup> |
| 781.5706 | 10.56               | 5.56 $\pm$ 22.24                                | 305.61 $\pm$ 558.54       | 0.04008 <sup>a</sup> |
| 790.5659 | 9.36                | 0.00 $\pm$ 0.00                                 | 696.12 $\pm$ 1217.38      | 0.02949 <sup>a</sup> |
| 806.5619 | 8.21                | 27.05 $\pm$ 59.67                               | 814.50 $\pm$ 1422.86      | 0.03484 <sup>a</sup> |
| 820.5813 | 8.66                | 0.00 $\pm$ 0.00                                 | 878.87 $\pm$ 1543.27      | 0.03011 <sup>a</sup> |
| 825.6519 | 9.02                | 2087.54 $\pm$ 1451.45                           | 3400.35 $\pm$ 977.26      | 0.00649 <sup>b</sup> |
| 834.5959 | 9.18                | 0.00 $\pm$ 0.00                                 | 732.10 $\pm$ 1281.34      | 0.02961 <sup>a</sup> |
| 846.4894 | 8.88                | 0.00 $\pm$ 0.00                                 | 108.91 $\pm$ 166.83       | 0.01404 <sup>a</sup> |
| 850.5888 | 8.13                | 41.19 $\pm$ 74.13                               | 572.74 $\pm$ 991.30       | 0.04082 <sup>a</sup> |
| 864.6057 | 8.66                | 4.12 $\pm$ 16.48                                | 720.45 $\pm$ 1258.95      | 0.03025 <sup>a</sup> |
| 869.6742 | 9.07                | 53.59 $\pm$ 100.55                              | 169.79 $\pm$ 148.80       | 0.01584 <sup>a</sup> |
| 894.6149 | 8.03                | 34.80 $\pm$ 62.52                               | 368.73 $\pm$ 626.89       | 0.04251 <sup>a</sup> |
| 908.5086 | 8.33                | 320.41 $\pm$ 292.09                             | 542.87 $\pm$ 300.67       | 0.04557 <sup>a</sup> |
| 908.624  | 8.4                 | 0.00 $\pm$ 0.00                                 | 523.22 $\pm$ 914.08       | 0.02934 <sup>a</sup> |
| 924.6253 | 7.62                | 11.75 $\pm$ 32.29                               | 111.79 $\pm$ 185.84       | 0.04253 <sup>a</sup> |
| 933.6086 | 8.94                | 13.74 $\pm$ 54.96                               | 304.52 $\pm$ 390.01       | 0.00616 <sup>b</sup> |
| 938.6393 | 8                   | 25.17 $\pm$ 45.25                               | 231.68 $\pm$ 378.33       | 0.03839 <sup>a</sup> |
| 939.5717 | 11.62               | 419.64 $\pm$ 354.89                             | 176.88 $\pm$ 161.37       | 0.02186 <sup>a</sup> |
| 952.6556 | 8.34                | 13.86 $\pm$ 30.97                               | 339.69 $\pm$ 575.89       | 0.03135 <sup>a</sup> |
| 982.6635 | 7.88                | 3.55 $\pm$ 14.19                                | 138.40 $\pm$ 228.21       | 0.02513 <sup>a</sup> |
| 988.5866 | 8.78                | 154.23 $\pm$ 180.32                             | 421.95 $\pm$ 454.59       | 0.03738 <sup>a</sup> |
| 989.6534 | 6.6                 | 7.60 $\pm$ 30.41                                | 125.81 $\pm$ 226.30       | 0.04727 <sup>a</sup> |
| 991.6469 | 8.78                | 72502.61 $\pm$ 34209.43                         | 135323.94 $\pm$ 100784.87 | 0.02550 <sup>a</sup> |
| 994.6572 | 8.78                | 2739.97 $\pm$ 1326.63                           | 4715.69 $\pm$ 2785.68     | 0.01641 <sup>a</sup> |
| 996.6774 | 8.24                | 0.00 $\pm$ 0.00                                 | 228.81 $\pm$ 385.48       | 0.02427 <sup>a</sup> |

<sup>a</sup>P<0.05, <sup>b</sup>P<0.01, <sup>c</sup>P<0.001.



Table SII. Metabolites with significant differences between serum samples from chemo-sensitive and -resistant patients in negative ion mode.

| m/z      | Retention time, min | Signal intensity, mean $\pm$ standard deviation |                         | P-value              |
|----------|---------------------|-------------------------------------------------|-------------------------|----------------------|
|          |                     | Sensitive                                       | Resistant               |                      |
| 80.9163  | 10.35               | 6.94 $\pm$ 20.3                                 | 33.12 $\pm$ 40.4        | 0.02871a             |
| 80.9165  | 9.11                | 4.01 $\pm$ 11.66                                | 19.39 $\pm$ 19.64       | 0.01227 <sup>a</sup> |
| 131.0862 | 7.37                | 0.66 $\pm$ 2.65                                 | 20.32 $\pm$ 37.39       | 0.04454 <sup>a</sup> |
| 141.0551 | 7.72                | 1.03 $\pm$ 4.12                                 | 14.63 $\pm$ 24.52       | 0.03684 <sup>a</sup> |
| 144.0117 | 2.17                | 0.00 $\pm$ 0.00                                 | 14.31 $\pm$ 25.39       | 0.03169 <sup>a</sup> |
| 155.1087 | 7.31                | 68.32 $\pm$ 174.02                              | 918.78 $\pm$ 1580.14    | 0.04077 <sup>a</sup> |
| 171.1395 | 9.25                | 1628.89 $\pm$ 2757.23                           | 159.94 $\pm$ 116.17     | 0.04853 <sup>a</sup> |
| 177.092  | 7.55                | 1.72 $\pm$ 6.90                                 | 35.37 $\pm$ 58.59       | 0.02997 <sup>a</sup> |
| 183.1392 | 8.05                | 2.06 $\pm$ 5.65                                 | 56.90 $\pm$ 103.56      | 0.04296 <sup>a</sup> |
| 197.0803 | 7.65                | 0.00 $\pm$ 0.00                                 | 5.97 $\pm$ 11.16        | 0.04063 <sup>a</sup> |
| 205.1603 | 9.95                | 75.43 $\pm$ 62.9                                | 128.76 $\pm$ 47.72      | 0.01303 <sup>a</sup> |
| 211.1688 | 10.17               | 6.25 $\pm$ 10.17                                | 0.00 $\pm$ 0.00         | 0.02427 <sup>a</sup> |
| 213.114  | 7.65                | 0.00 $\pm$ 0.00                                 | 6.01 $\pm$ 9.91         | 0.02160 <sup>a</sup> |
| 215.1294 | 7.73                | 3.19 $\pm$ 8.75                                 | 73.22 $\pm$ 136.51      | 0.04952 <sup>a</sup> |
| 279.1994 | 8.71                | 13.30 $\pm$ 36.66                               | 124.82 $\pm$ 193.81     | 0.03141 <sup>a</sup> |
| 297.6274 | 2.47                | 14.52 $\pm$ 25.21                               | 0.67 $\pm$ 2.60         | 0.04317 <sup>a</sup> |
| 301.2201 | 9.7                 | 8.10 $\pm$ 32.38                                | 124.66 $\pm$ 168.29     | 0.01091 <sup>a</sup> |
| 307.228  | 11.46               | 24.87 $\pm$ 38.14                               | 3.17 $\pm$ 8.39         | 0.03971 <sup>a</sup> |
| 317.219  | 9.71                | 16.50 $\pm$ 40.84                               | 79.62 $\pm$ 102.91      | 0.03068 <sup>a</sup> |
| 319.2316 | 9.7                 | 1286.64 $\pm$ 3197.64                           | 6461.94 $\pm$ 8960.08   | 0.03836 <sup>a</sup> |
| 327.2643 | 10.27               | 32.79 $\pm$ 61.52                               | 0.00 $\pm$ 0.00         | 0.04825 <sup>a</sup> |
| 334.2397 | 11.46               | 15.51 $\pm$ 27.95                               | 0.00 $\pm$ 0.00         | 0.04034 <sup>a</sup> |
| 342.56   | 6.53                | 2.81 $\pm$ 8.35                                 | 57.25 $\pm$ 88.28       | 0.02021 <sup>a</sup> |
| 369.1794 | 6.42                | 1959.43 $\pm$ 2993.87                           | 5229.94 $\pm$ 4008.68   | 0.01504 <sup>a</sup> |
| 376.2258 | 6.68                | 214.11 $\pm$ 162.42                             | 328.33 $\pm$ 119.74     | 0.03470 <sup>a</sup> |
| 383.1773 | 8.58                | 0.00 $\pm$ 0.00                                 | 24.79 $\pm$ 43.13       | 0.02874 <sup>a</sup> |
| 389.2728 | 7.56                | 25.44 $\pm$ 41.96                               | 2.65 $\pm$ 10.26        | 0.04998 <sup>a</sup> |
| 391.2714 | 11.67               | 8.93 $\pm$ 16.48                                | 54.52 $\pm$ 82.45       | 0.03851 <sup>a</sup> |
| 393.1172 | 7.1                 | 0.00 $\pm$ 0.00                                 | 117.22 $\pm$ 208.32     | 0.03197 <sup>a</sup> |
| 398.9475 | 6.76                | 28.96 $\pm$ 42.03                               | 130.65 $\pm$ 190.11     | 0.04567 <sup>a</sup> |
| 407.2875 | 6.84                | 0.00 $\pm$ 0.00                                 | 30.97 $\pm$ 52.94       | 0.02621 <sup>a</sup> |
| 411.2457 | 7.56                | 0.00 $\pm$ 0.00                                 | 8.31 $\pm$ 13.18        | 0.01726 <sup>a</sup> |
| 428.1936 | 8.16                | 15.79 $\pm$ 19.29                               | 34.50 $\pm$ 25.13       | 0.02669 <sup>a</sup> |
| 437.1678 | 6.42                | 1.85 $\pm$ 7.41                                 | 25.72 $\pm$ 34.19       | 0.01071 <sup>a</sup> |
| 447.2166 | 7.16                | 11.89 $\pm$ 20.63                               | 0.00 $\pm$ 0.00         | 0.03374 <sup>a</sup> |
| 449.1916 | 8.35                | 792.5 $\pm$ 1262.94                             | 76.88 $\pm$ 297.77      | 0.04112 <sup>a</sup> |
| 473.2349 | 8.34                | 37.19 $\pm$ 51.74                               | 6.45 $\pm$ 24.98        | 0.04613 <sup>a</sup> |
| 493.1314 | 8.33                | 4.29 $\pm$ 17.17                                | 22.87 $\pm$ 29.87       | 0.04084 <sup>a</sup> |
| 500.2912 | 8.33                | 4724.75 $\pm$ 4994.74                           | 8372.98 $\pm$ 3946.14   | 0.03247 <sup>a</sup> |
| 508.355  | 9.97                | 142.92 $\pm$ 169.88                             | 333.90 $\pm$ 307.29     | 0.03917 <sup>a</sup> |
| 516.3336 | 9.12                | 12.40 $\pm$ 34.87                               | 100.46 $\pm$ 159.51     | 0.03948 <sup>a</sup> |
| 526.3666 | 9.09                | 173.90 $\pm$ 252.83                             | 623.42 $\pm$ 802.14     | 0.04147 <sup>a</sup> |
| 536.3074 | 7.68                | 34.86 $\pm$ 31.83                               | 6.40 $\pm$ 16.99        | 0.00455 <sup>b</sup> |
| 536.3176 | 7.74                | 2.02 $\pm$ 8.07                                 | 25.87 $\pm$ 37.05       | 0.01772 <sup>a</sup> |
| 537.2686 | 8.59                | 0.00 $\pm$ 0.00                                 | 12.40 $\pm$ 22.37       | 0.03441 <sup>a</sup> |
| 537.3455 | 8.67                | 704.87 $\pm$ 715.98                             | 1229.92 $\pm$ 552.89    | 0.03055 <sup>a</sup> |
| 540.3447 | 8.68                | 13281.30 $\pm$ 20364.88                         | 28726.85 $\pm$ 21107.94 | 0.04712 <sup>a</sup> |
| 544.3341 | 9.27                | 27.07 $\pm$ 56.19                               | 128.54 $\pm$ 162.66     | 0.02565 <sup>a</sup> |
| 544.9786 | 8.11                | 129.02 $\pm$ 352.55                             | 479.69 $\pm$ 537.40     | 0.03903 <sup>a</sup> |
| 552.3467 | 8.51                | 75.32 $\pm$ 104.96                              | 211.21 $\pm$ 216.06     | 0.03220 <sup>a</sup> |
| 552.3848 | 9.39                | 215.70 $\pm$ 255.92                             | 586.01 $\pm$ 498.88     | 0.01367 <sup>a</sup> |
| 554.3639 | 9.3                 | 330.12 $\pm$ 332.65                             | 795.02 $\pm$ 812.75     | 0.04368 <sup>a</sup> |
| 561.3563 | 8.4                 | 561.35 $\pm$ 284.94                             | 764.83 $\pm$ 267.15     | 0.04975 <sup>a</sup> |
| 562.5871 | 8.4                 | 26.69 $\pm$ 53.20                               | 74.20 $\pm$ 69.37       | 0.04019 <sup>a</sup> |
| 565.3792 | 9.94                | 251.98 $\pm$ 208.42                             | 470.18 $\pm$ 276.74     | 0.01874 <sup>a</sup> |
| 574.4153 | 11.2                | 0.00 $\pm$ 0.00                                 | 430.40 $\pm$ 774.18     | 0.03392 <sup>a</sup> |

Table SII. Continued.

| m/z      | Retention time, min | Signal intensity, mean $\pm$ standard deviation |                     | P-value              |
|----------|---------------------|-------------------------------------------------|---------------------|----------------------|
|          |                     | Sensitive                                       | Resistant           |                      |
| 593.149  | 8.02                | 13.41 $\pm$ 21.26                               | 67.77 $\pm$ 71.48   | 0.00686 <sup>b</sup> |
| 600.2688 | 8.36                | 8.92 $\pm$ 35.67                                | 84.98 $\pm$ 129.73  | 0.03163 <sup>a</sup> |
| 600.285  | 8.98                | 76.04 $\pm$ 108.28                              | 171.28 $\pm$ 140.29 | 0.04232 <sup>a</sup> |
| 610.391  | 9.01                | 80.76 $\pm$ 126.42                              | 193.23 $\pm$ 175.27 | 0.04854 <sup>a</sup> |
| 826.5665 | 8.74                | 327.43 $\pm$ 598.88                             | 0.00 $\pm$ 0.00     | 0.04312 <sup>a</sup> |
| 828.5959 | 8.88                | 0.00 $\pm$ 0.00                                 | 61.29 $\pm$ 106.1   | 0.02800 <sup>a</sup> |
| 947.6478 | 8.59                | 0.00 $\pm$ 0.00                                 | 349.31 $\pm$ 551.19 | 0.01678 <sup>a</sup> |
| 973.6725 | 8.84                | 0.00 $\pm$ 0.00                                 | 139.48 $\pm$ 210.15 | 0.01266 <sup>a</sup> |

<sup>a</sup>P<0.05, <sup>b</sup>P<0.01, <sup>c</sup>P<0.001.
